# Supplementary material for: Leveraging the South African Diabetes Prevention Programme to screen for chronic kidney disease: an observational study
Source: HighWire-hosted journal article supplement (doi:10.1136/bmjopen-2022-068672), 2023-01-01
Supplement: bmjopen-2022-068672supp001_data_supplement.pdf [file bmjopen-2022-068672supp001_data_supplement.pdf]

**Addendum A:** Flow diagram of recruitment process over two phases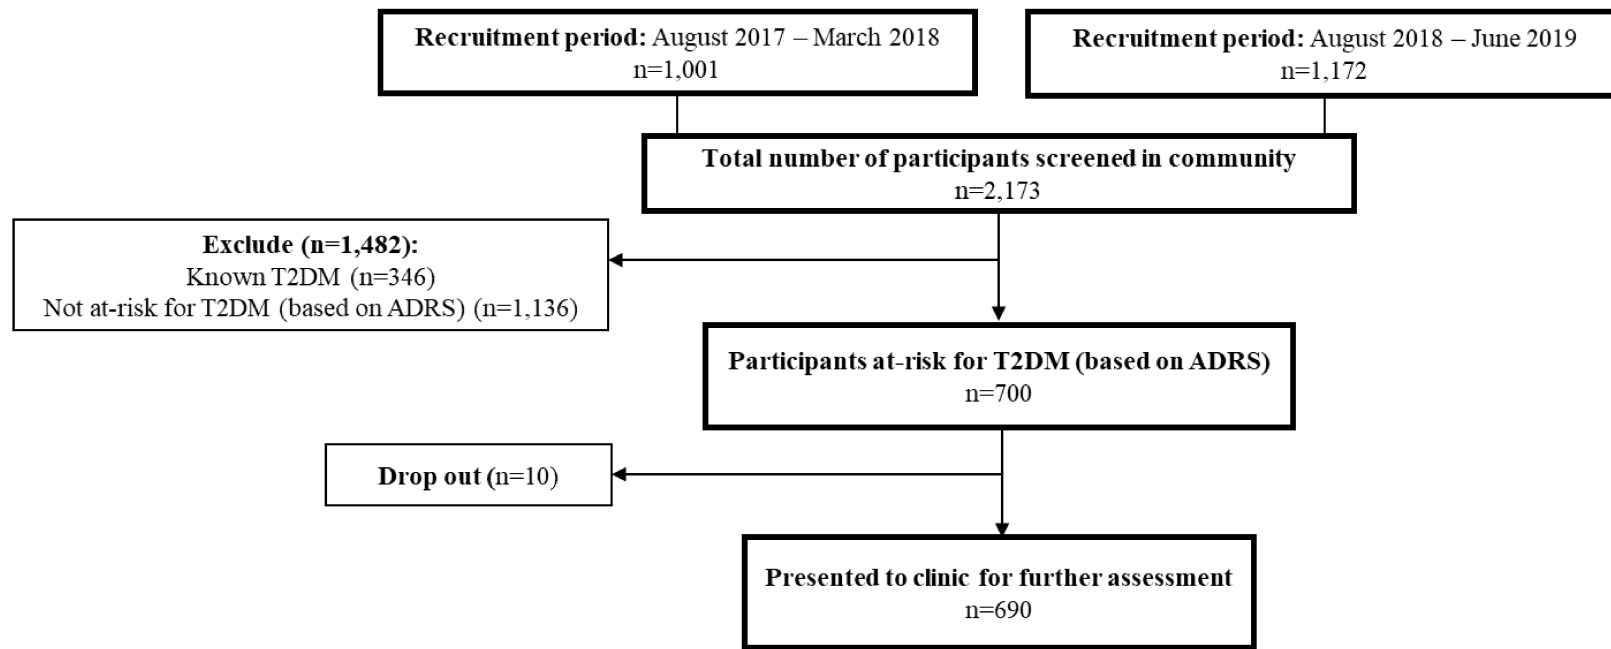

Abbreviations: T2DM, type 2 diabetes mellitus; ADRS, African Diabetes Risk Score
